# Supplementary material
Source: Springer Nature journal article supplement (https://www.springermedizin.de/resource/supplementary/13054_2005_4400_MOESM3_ESM.pdf/9722854)
Supplement: MOESM3 [file 9722854]

**Figure 2. Effect of decompressive laparotomy on urinary output in ten studies reporting urinary output before and after decompressive laparotomy.**

**Panel B. Boxplot of urinary output before and after decompressive laparotomy.**

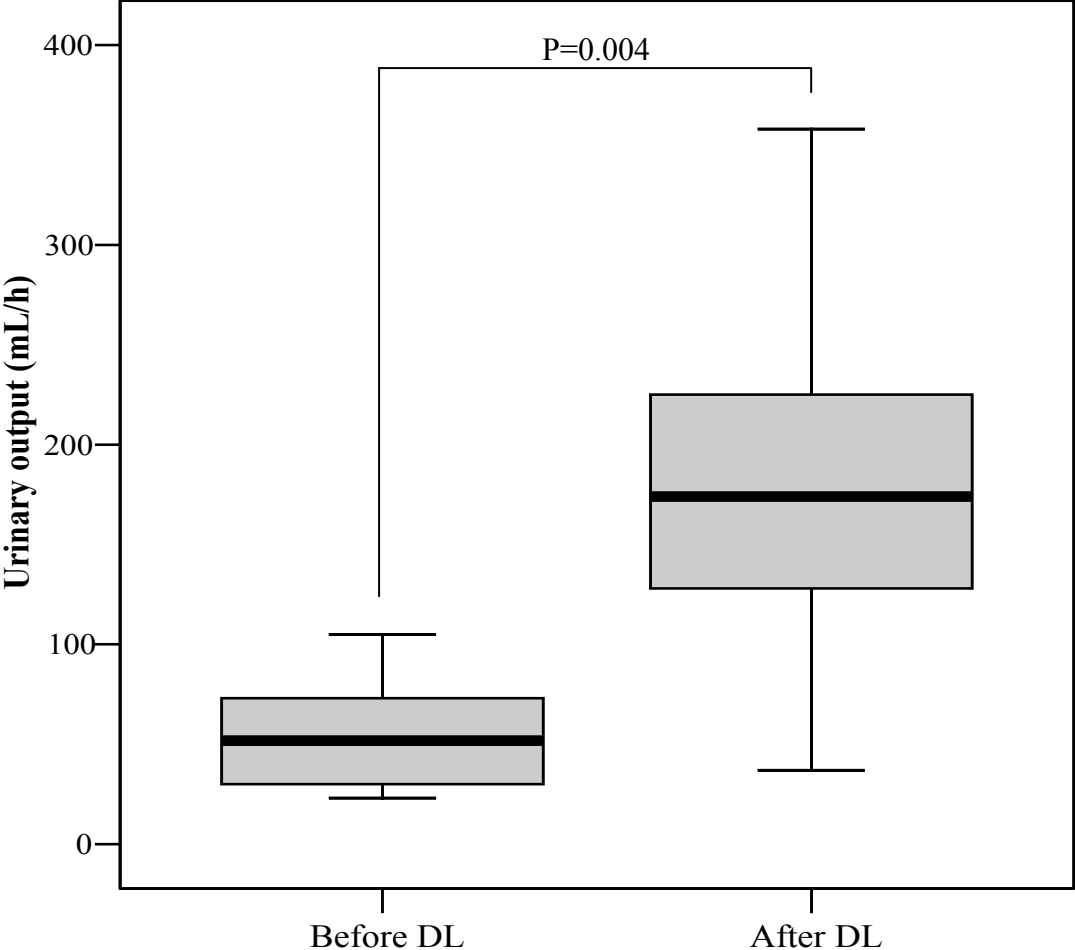

**Legend:** DL=decompressive laparotomy.
